# Supplementary material for: Deciphering the Antifibrotic Property of Metformin
Source: MDPI journal article supplement (doi:10.3390/cells11244090), 2022-12-16
Supplement: s1 [file s1]

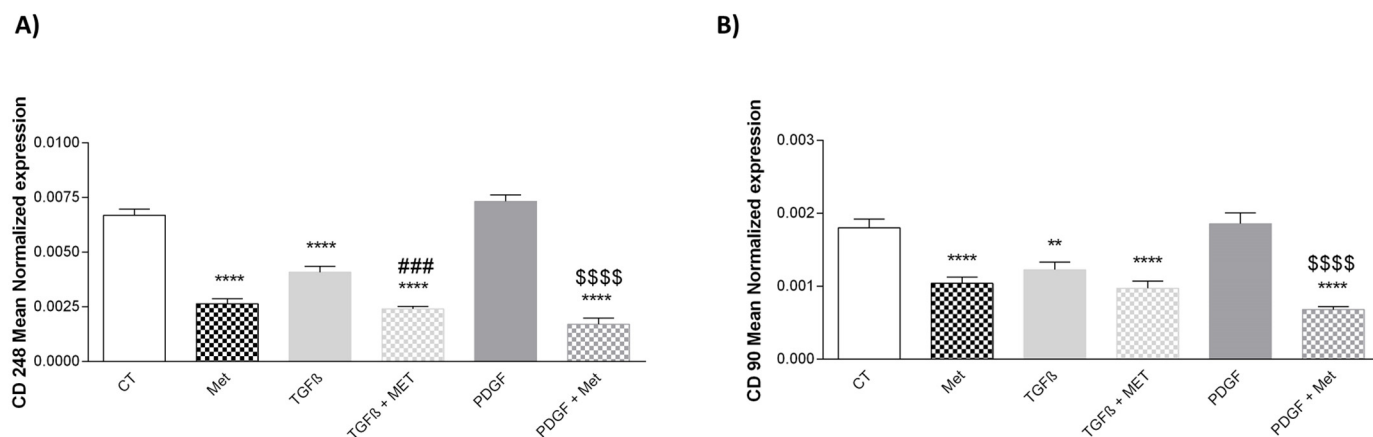

**Supplemental Figure 1: Effects of TGF-β1 or PDGF on MSC cell markers (CD90 and CD248).** Cells were exposed to TGF-β1 or PDGF at 10ng/mL in association or not with Met (5mM) for 72 h. Then, RNA was collected and (A) CD 248 and (B) CD 90 gene expression levels were determined by qRT-PCR. Reported values are means ± SEM of three independent experiments and p value was calculated using the Bonferroni multiple comparison test: \*\*:  $p < 0.01$  and \*\*\*\*:  $p < 0.0001$  as compared to control, ####:  $p < 0.001$  as compared to TGF-β1 and \$\$\$\$:  $p < 0.0001$  as compared to PDGF.
